# Supplementary material for: Transcranial Magnetic Stimulation Measures, Pyramidal Score on Expanded Disability Status Scale and Magnetic Resonance Imaging of Corticospinal Tract in Multiple Sclerosis
Source: MDPI journal article supplement (doi:10.3390/bioengineering10101118), 2023-09-24
Supplement: s1 [file s1]

**Table S1.** TMS measures (RMT, MEP latency, and MEP amplitude) for individual pwMS subjects.

| LEFT hemisphere stimulation |              |                     |                       |              |                     |                       |              |                     |                       |              |                     |                       |
|-----------------------------|--------------|---------------------|-----------------------|--------------|---------------------|-----------------------|--------------|---------------------|-----------------------|--------------|---------------------|-----------------------|
| pwMS                        | RMT %        | APB                 |                       | RMT %        | ADM                 |                       | RMT %        | TA                  |                       | RMT %        | AH                  |                       |
|                             |              | MEP<br>Latency (ms) | MEP<br>Amplitude (μV) |
| Pwms TMS-A                  | 1            | 44                  | 29,9                  | 76           | 29,9                | 24,6                  | 100          | *                   | *                     | 100          | 60,0                | 91,4                  |
|                             | 2            | 45                  | 25,3                  | 45           | 24,3                | 419,1                 | 67           | 33,5                | 77,4                  | 70           | 44,3                | 194,82                |
|                             | 3            | 36                  | 31,7                  | 42           | 30,7                | 82,0                  | 79           | 47,0                | 17,8                  | 79           | 55,3                | 95,59                 |
|                             | 4            | 51                  | 26,6                  | 51           | 25,8                | 112,0                 |              |                     |                       | 87           | 51,9                | 242,43                |
|                             | 5            | 24                  | 22,8                  | 24           | 23,4                | 130,2                 | 59           | 36,2                | 57,4                  | 55           | 48,6                | 484,71                |
|                             | 6            | 40                  | 20,7                  | 40           | 23,1                | 127,6                 | 100          | *                   | *                     | 92           | 47,7                | 334,09                |
|                             | 7            | 44                  | 33,7                  | 44           | 31,6                | 132,1                 | 100          | 56,0                | 45,2                  | 100          | 55,0                | 139,43                |
|                             | 8            | 26                  | 24,3                  | 26           | 24,2                | 199,7                 | 74           | 39,0                | 129,5                 | 74           | 50,4                | 254,46                |
|                             | 9            | 49                  | 24,4                  | 55           | 23,7                | 99,1                  | *            | *                   | *                     | 100          | 45,0                | 38,62                 |
|                             | 10           | 37                  | 19,7                  | 37           | 18,6                | 84,2                  | 100          | *                   | *                     | 100          |                     | *                     |
|                             | 11           | 33                  | 22,6                  | 33           | 23,2                | 235,6                 | 79           | 37,0                | 184,8                 | 79           | 45,8                | 145,67                |
|                             | 12           | 53                  | 26,6                  | 53           | 24,0                | 236,6                 | 100          | *                   | *                     | 78           | 49,3                | 492,05                |
|                             | 13           | 49                  | 22,1                  | 51           | 22,5                | 126,0                 | 93           | 40,8                | 144,0                 | 90           | 43,3                | 132,06                |
|                             | 14           | 31                  | 25,9                  | 31           | 24,6                | 320,9                 | 65           | 31,7                | 105,9                 | 59           | 47,0                | 184,72                |
|                             | 15           | 60                  | 20,3                  | 60           | 21,5                | 177,5                 | 98           | 32,3                | 95,2                  | 98           | 43,0                | 95,49                 |
| Pwms TMS-N                  | 1            | 36                  | 20,4                  | 36           | 20,1                | 151,5                 | 0            | 0                   | 0                     | 57           | 40,1                | 370,64                |
|                             | 2            | 29                  | 21,4                  | 29           | 22,1                | 179,0                 | 74           | 31,7                | 94,9                  | 72           | 45,0                | 427,24                |
|                             | 3            | 35                  | 24,5                  | 37           | 23,1                | 111,3                 | 69           | 31,7                | 74,6                  | 65           | 41,9                | 344,33                |
|                             | 4            | 38                  | 21,6                  | 37           | 21,7                | 104,6                 | 81           | 30,1                | 71,6                  | 70           | 43,0                | 138,32                |
|                             | 5            | 48                  | 23,0                  | 48           | 23,1                | 130,3                 | 81           | 33,3                | 129,0                 | 78           | 42,6                | 370,47                |
|                             | 6            | 34                  | 20,4                  | 34           | 21,7                | 269,2                 | 50           | 32,3                | 245,2                 | 50           | 44,2                | 341,03                |
|                             | 7            | 33                  | 22,8                  | 34           | 22,7                | 137,4                 | 61           | 26,3                | 83,8                  | 55           | 43,0                | 460,55                |
|                             | 8            | 51                  | 21,9                  | 49           | 23,2                | 150,6                 | 87           | 33,3                | 64,3                  | 90           | 45,8                | 199,24                |
| <b>M</b>                    | <b>40,26</b> | <b>24,07</b>        | <b>276,07</b>         | <b>42,26</b> | <b>23,91</b>        | <b>162,70</b>         | <b>81,14</b> | <b>36,05</b>        | <b>101,57</b>         | <b>78,17</b> | <b>46,96</b>        | <b>253,52</b>         |
| <b>SD</b>                   | <b>9,42</b>  | <b>3,70</b>         | <b>172,45</b>         | <b>12,10</b> | <b>3,12</b>         | <b>86,77</b>          | <b>15,58</b> | <b>7,09</b>         | <b>54,23</b>          | <b>16,37</b> | <b>5,01</b>         | <b>141,33</b>         |
| No MEP response             |              |                     |                       |              |                     |                       | 1            | 5                   | 5                     |              | 1                   | 1                     |
| % no response               |              |                     |                       |              |                     |                       | 4,35%        | 21,74%              | 21,74%                |              | 4,35%               | 4,35%                 |

| RIGHT hemisphere stimulation |       |                     |                       |        |                     |                       |        |                     |                       |       |                     |                       |         |
|------------------------------|-------|---------------------|-----------------------|--------|---------------------|-----------------------|--------|---------------------|-----------------------|-------|---------------------|-----------------------|---------|
|                              |       | APB                 |                       |        | ADM                 |                       |        | TA                  |                       |       | AH                  |                       |         |
| pwMS                         | RMT % | MEP<br>Latency (ms) | MEP<br>Amplitude (μV) | RMT %  | MEP<br>Latency (ms) | MEP<br>Amplitude (μV) | RMT %  | MEP<br>Latency (ms) | MEP<br>Amplitude (μV) | RMT % | MEP<br>Latency (ms) | MEP<br>Amplitude (μV) |         |
| pwMS MEP altered             | 1     | 42                  | 23,0                  | 119,5  | 42                  | 22,9                  | 204,5  | 94                  | 32,5                  | 187,0 | 94                  | 41,6                  | 254,39  |
|                              | 2     | 48                  | 27,6                  | 63,3   | 49                  | 25,4                  | 208,1  | 87                  | 36,6                  | 51,6  | 87                  | 47,2                  | 152,31  |
|                              | 3     | 37                  | 30,0                  | 99,7   | 37                  | 30,0                  | 104,5  | 80                  | -                     | -     | 80                  | 58,1                  | 284,57  |
|                              | 4     | 44                  | 27,0                  | 245,8  | 44                  | 25,0                  | 93,8   | 82                  | 36,4                  | 85,9  | 82                  | 46,4                  | 142,63  |
|                              | 5     | 31                  | 26,5                  | 96,5   | 31                  | 27,8                  | 124,0  | 62                  | 40                    | 49,8  | 54                  | 47,1                  | 176,83  |
|                              | 6     | 48                  | 23,6                  | 96,7   | 49                  | 24,2                  | 106,4  | 100                 | *                     | *     | N*                  | *                     | *       |
|                              | 7     | 54                  | 25,0                  | 288,2  | 54                  | 26,9                  | 152,4  | 100                 | 41,9                  | 47,9  | 84                  | 46,3                  | 352,88  |
|                              | 8     | 45                  | 25,7                  | 350,6  | 45                  | 25,3                  | 106,4  | 87                  | 42,4                  | 111,4 | 89                  | 52,5                  | 331,58  |
|                              | 9     | 57                  | 18,9                  | 182,9  | 57                  | 19,6                  | 514,6  | 96                  | 28,7                  | 61,7  | 96                  | 40,0                  | 44,06   |
|                              | 10    | 49                  | 20,8                  | 197,5  | 49                  | 21,5                  | 234,3  | 99                  | 31,5                  | 122,6 | 99                  | 39,5                  | 410,82  |
|                              | 11    | 35                  | 22,7                  | 261,1  | 35                  | 24,5                  | 433,1  | 73                  | 32,7                  | 659,9 | 73                  | 49,2                  | 306,69  |
|                              | 12    | 53                  | 27,6                  | 177,3  | 53                  | 29,3                  | 156,4  | 100                 | *                     | *     | 100                 | 46,8                  | 241,82  |
|                              | 13    | 100                 | *                     | *      | 91                  | 27,1                  | 95,2   | 100                 | *                     | *     | 100                 | *                     | *       |
|                              | 14    | 40                  | 23,5                  | 166,5  | 83                  | 25,3                  | 398,8  | 83                  | 32,7                  | 101,4 | 83                  | 44,2                  | 423,03  |
|                              | 15    | 65                  | 20,8                  | 152,3  | 65                  | 21,1                  | 222,07 | 100                 | *                     | *     | 100                 | *                     | *       |
| pwMS MEP non altered         | 1     | 37                  | 21,7                  | 98,6   | 43                  | 21,1                  | 41,6   | -                   | -                     | -     | 56                  | 42,7                  | 271,44  |
|                              | 2     | 43                  | 24,1                  | 209,9  | 43                  | 23,3                  | 566,3  | -                   | -                     | -     | 79                  | 42,2                  | 647,4   |
|                              | 3     | 42                  | 23,8                  | 521,4  | 43                  | 22,7                  | 107,5  | 75                  | 31,9                  | 73,1  | 72                  | 41,5                  | 551,48  |
|                              | 4     | 37                  | 22,5                  | 161,4  | 37                  | 20,4                  | 129,3  | 64                  | 30,1                  | 100,8 | 60                  | 41,6                  | 1308,72 |
|                              | 5     | 51                  | 23,6                  | 1118,4 | 51                  | 24,2                  | 172,6  | 62                  | 32,9                  | 217,5 | 62                  | 42,1                  | 500,49  |
|                              | 6     | 39                  | 20,9                  | 71,9   | 39                  | 21,7                  | 215,2  | 54                  | 32,5                  | 254,9 | 55                  | 41,7                  | 435,99  |
|                              | 7     | 34                  | 23,2                  | 172,6  | 34                  | 22,2                  | 233,0  | 53                  | 32,3                  | 92,4  | 50                  | 42,1                  | 532,62  |
|                              | 8     | 50                  | 21,3                  | 181,3  | 50                  | 21,1                  | 73,3   | 83                  | 32,9                  | 70,0  | 77                  | 43,9                  | 209,45  |
| M                            |       | 47,0                | 23,8                  | 232,0  | 48,8                | 24,0                  | 204,1  | 82,5                | 34,2                  | 143,0 | 78,7                | 44,8                  | 378,96  |
| SD                           |       | 14,1                | 2,7                   | 229,1  | 14,4                | 2,8                   | 142,0  | 16,0                | 4,0                   | 150,7 | 16,5                | 4,5                   | 267,82  |
| No MEP response              |       | 1                   | 1                     |        |                     |                       |        | 4                   | 4                     | 1     | 3                   | 3                     |         |
| % no response                |       | 4,35%               | 4,35%                 |        |                     |                       |        | 17,39%              | 17,39%                | 4,35% | 13,04%              | 13,04%                |         |

*Abbreviations: APB –Abductor Pollicis Brevis ; ADM – Abductor Digiti Minimi ; TA – Tibialis Anterior; AH – Abductor Hallucis; RMT % –Resting Motor Threshold; SD – standard deviation; pwMS -people with multiple sclerosis; pwMS with altered MEP findings (prolonged MEP latency or absent MEP response); pwMS with non altered MEP findings (MEP response induced); \* -no MEP response; “-“ technical error.*
